# Supplementary material
Source: publisher site journal article supplement (https://www.dovepress.com/article/450471)
Supplement: Supplementary file 1 [file get_supplementary_file.php]

**Table S1 The list of mitophagy-related genes**

| <b>Id</b> |
|-----------|
| AMBRA1    |
| ARFIP2    |
| ATF4      |
| ATG12     |
| ATG13     |
| ATG14     |
| ATG2A     |
| ATG2B     |
| ATG3      |
| ATG4B     |
| ATG4D     |
| ATG5      |
| ATG7      |
| ATG9A     |
| ATG9B     |
| ATP13A2   |
| ATP5IF1   |
| BCL2L1    |
| BECN      |

|         |
|---------|
| BECN1   |
| BNIP3   |
| BNIP3L  |
| CAMKK2  |
| CDC37   |
| CERS1   |
| CISD2   |
| PTGS2   |
| CSNK2A  |
| CSNK2A1 |
| CSNK2A2 |
| CSNK2B  |
| CTSK    |
| CTTN    |
| DNM1L   |
| EIF2AK3 |
| FBXL4   |
| FBXO7   |
| FBXW7   |
| FIS1    |
| FOXO3   |

|           |
|-----------|
| FUNDC1    |
| FUNDC2    |
| FZD5      |
| GABARAP   |
| GABARAPL1 |
| GABARAPL2 |
| GABARAPL3 |
| GBA       |
| GSK3A     |
| HAX1      |
| HDAC6     |
| HIF1A     |
| HK2       |
| HRAS      |
| HTRA2     |
| HTT       |
| HUWE1     |
| JNK       |
| JUN       |
| KRAS      |
| LRBA      |

|           |
|-----------|
| MAP1LC    |
| MAP1LC3A  |
| MAP1LC3B  |
| MAP1LC3B2 |
| MAP1LC3C  |
| MARK2     |
| MFN1      |
| MFN2      |
| MITF      |
| MRAS      |
| MTERF3    |
| MUL1      |
| NRAS      |
| OGT       |
| OPTN      |
| PARK2     |
| PARK7     |
| PARL      |
| PGAM5     |
| PHB2      |
| PINK1     |

|          |
|----------|
| PRKN     |
| RAB7A    |
| RAB7B    |
| RB1CC1   |
| RELA     |
| RETREG1  |
| RHOT1    |
| RHOT2    |
| RIMOC1   |
| RNF41    |
| RP-L40e  |
| RPS27A   |
| RP-S27Ae |
| RRAS     |
| RRAS2    |
| SLC25A4  |
| SLC25A46 |
| SLC25A5  |
| SNX30    |
| SNX7     |
| SP1      |

|          |
|----------|
| SPATA18  |
| SPATA33  |
| SQSTM1   |
| SRC      |
| SREBF1   |
| SREBF2   |
| TAFAZZIN |
| TBK1     |
| TFE3     |
| TIGAR    |
| TOMM20   |
| TOMM22   |
| TOMM40   |
| TOMM5    |
| TOMM6    |
| TOMM7    |
| TOMM70   |
| TP53     |
| TSC2     |
| TSPO     |
| UBA52    |

|        |
|--------|
| UBB    |
| UBC    |
| ULK1   |
| ULK2   |
| USP30  |
| USP36  |
| VDAC1  |
| VPS13C |
| VPS13D |
| WDR45  |
| WDR45B |
| WIPI1  |
| WIPI2  |

**Table S2. The list of primer sequences**

|           |                 |                      |
|-----------|-----------------|----------------------|
| <b>01</b> | MRAS FORWARD    | GGAAGATCACCAGGGAGC   |
| <b>02</b> | MRAS REVERSE    | ACGAGGTCATGGAAGGCTT  |
| <b>03</b> | RAB7B FORWARD   | ATGTGGTGCAAGCGTTTGA  |
| <b>04</b> | RAB7B REVERSE   | CTTGACTGGTCTGGCGAGA  |
| <b>05</b> | RETREG1 FORWARD | CTGTTCTGGTTCCTTGCATT |
| <b>06</b> | RETREG1 REVERSE | TTCACTGAGGCTTCTCCACA |

**Table S3. The results of the Cmap dataset**

| <b>Score</b> | <b>ID</b>     | <b>Name</b>   | <b>Description</b>                          | <b>MOA</b>                                                  |
|--------------|---------------|---------------|---------------------------------------------|-------------------------------------------------------------|
| -98.01       | BRD-K80527266 | triacsin-c    | Adrenergic receptor antagonist              | Adrenergic receptor antagonist                              |
| -98.03       | BRD-U44618005 | WH-4023       | SRC inhibitor                               | SRC inhibitor                                               |
| -98.03       | BRD-K83322645 | L-693403      | Sigma receptor agonist                      | Sigma receptor agonist, Sigma receptor antagonist           |
| -98.06       | BRD-A35338386 | NECA          | Adenosine receptor agonist                  | Adenosine receptor agonist                                  |
| -98.13       | BRD-A23290232 | westcort      | Glucocorticoid receptor agonist             | Glucocorticoid receptor agonist                             |
| -98.2        | BRD-A18043272 | phensuximide  | Succinimide antiepileptic                   | Succinimide antiepileptic                                   |
| -98.24       | BRD-K99451608 | lopinavir     | HIV protease inhibitor                      | HIV protease inhibitor                                      |
| -98.27       | BRD-K76810206 | nicergoline   | Adrenergic receptor antagonist              | Adrenergic receptor antagonist                              |
| -98.27       | BRD-A92537424 | danazol       | Estrogen receptor antagonist                | Estrogen receptor antagonist, Progesterone receptor agonist |
| -98.31       | BRD-U97083655 | teicoplanin   | Bacterial cell wall synthesis inhibitor     | Bacterial cell wall synthesis inhibitor                     |
| -98.36       | BRD-K96670504 | lonidamine    | Glucokinase inhibitor                       | Glucokinase inhibitor                                       |
| -98.38       | BRD-K74514084 | pazopanib     | KIT inhibitor                               | KIT inhibitor, PDGFR receptor inhibitor, VEGFR inhibitor    |
| -98.38       | BRD-A55815733 | phylloquinone | Vitamin K                                   | Vitamin K, Gamma carboxylase enzyme                         |
| -98.41       | BRD-K73838513 | cinacalcet    | Calcium channel activator                   | Calcium channel activator                                   |
| -98.53       | BRD-A53952395 | prilocaine    | Local anesthetic                            | Local anesthetic                                            |
| -98.56       | BRD-K59633790 | VU-0420363-1  | SARS coronavirus 3C-like protease inhibitor | SARS coronavirus 3C-like protease inhibitor                 |
| -98.66       | BRD-K26015241 | ODQ           | Guanylyl cyclase inhibitor                  | Guanylyl cyclase inhibitor                                  |



|        |               |                       |                                   |                                                                      |
|--------|---------------|-----------------------|-----------------------------------|----------------------------------------------------------------------|
| -98.7  | BRD-A91555231 | norepinephrine        | Adrenergic receptor agonist       | Adrenergic receptor agonist                                          |
| -98.71 | BRD-K83963101 | MLN-8054              | Aurora kinase inhibitor           | Aurora kinase inhibitor, Mitotic inhibitor, Protein kinase inhibitor |
| -98.73 | BRD-K47943470 | tyrphostin-51         | EGFR inhibitor                    | EGFR inhibitor                                                       |
| -98.75 | BRD-K77641333 | naphazoline           | Adrenergic receptor agonist       | Adrenergic receptor agonist                                          |
| -98.77 | BRD-K84085265 | CG-930                | JNK inhibitor                     | JNK inhibitor                                                        |
| -98.81 | BRD-A09472452 | flecainide            | Sodium channel blocker            | Sodium channel blocker                                               |
| -98.83 | BRD-K62363391 | dapsone               | Bacterial antifolate              | Bacterial antifolate                                                 |
| -98.87 | BRD-A14985772 | ascorbyl-palmitate    | antioxidant                       | antioxidant                                                          |
| -98.87 | BRD-K48722833 | iloperidone           | Dopamine receptor antagonist      | Dopamine receptor antagonist, Serotonin receptor antagonist          |
| -98.87 | BRD-K97509413 | coumestrol            | Estrogen receptor agonist         | Estrogen receptor agonist                                            |
| -98.89 | BRD-K68095457 | palmitoylethanolamide | Cannabinoid receptor agonist      | Cannabinoid receptor agonist                                         |
| -98.91 | BRD-K90885812 | propantheline         | Acetylcholine receptor antagonist | Acetylcholine receptor antagonist                                    |
| -98.94 | BRD-K04146668 | GW-441756             | Growth factor receptor inhibitor  | Growth factor receptor inhibitor                                     |
| -98.97 | BRD-K08703257 | 3-amino-benzamide     | PARP inhibitor                    | PARP inhibitor                                                       |
| -99.01 | BRD-K90864987 | cobalt(II)-chloride   | HSP inducer                       | HSP inducer                                                          |
| -99.01 | BRD-K54790157 | trioxsalen            | DNA synthesis inhibitor           | DNA synthesis inhibitor                                              |
| -99.05 | BRD-K01624546 | docosatrienoic-acid   | LTB4 inhibitor                    | LTB4 inhibitor                                                       |
| -99.06 | BRD-K01902415 | pirinixic-acid        | PPAR receptor agonist             | PPAR receptor agonist                                                |
| -99.06 | BRD-K80738081 | resveratrol           | Cytochrome P450 inhibitor         | Cytochrome P450 inhibitor, SIRT activator                            |

|        |               |                   |                                                 |                                                                                                         |
|--------|---------------|-------------------|-------------------------------------------------|---------------------------------------------------------------------------------------------------------|
| -99.08 | BRD-K49456190 | prima-1-met       | thioredoxin inhibitor                           | thioredoxin inhibitor                                                                                   |
| -99.08 | BRD-K00675675 | CL-82198          | Metalloproteinase inhibitor                     | Metalloproteinase inhibitor                                                                             |
| -99.12 | BRD-A49172652 | lansoprazole      | ATPase inhibitor                                | ATPase inhibitor                                                                                        |
| -99.14 | BRD-K09436313 | prostaglandin     | Prostanoid receptor antagonist                  | Prostanoid receptor antagonist                                                                          |
| -99.19 | BRD-K33204703 | AG-370            | PDGFR receptor inhibitor                        | PDGFR receptor inhibitor                                                                                |
| -99.26 | BRD-K63195589 | tipifarnib        | Farnesyltransferase inhibitor                   | Farnesyltransferase inhibitor                                                                           |
| -99.3  | BRD-K67445247 | fluorofamide      | Urease inhibitor                                | Urease inhibitor                                                                                        |
| -99.31 | BRD-K70241288 | L-692585          | Growth hormone releasing peptide ligand agonist | Growth hormone releasing peptide ligand agonist                                                         |
| -99.33 | BRD-K06234293 | LY-364947         | TGF beta receptor inhibitor                     | TGF beta receptor inhibitor, p38 MAPK inhibitor                                                         |
| -99.37 | BRD-K32795028 | 1-benzylimidazole | Thromboxane synthase inhibitor                  | Thromboxane synthase inhibitor                                                                          |
| -99.37 | BRD-K59650319 | YM-298198         | Glutamate receptor antagonist                   | Glutamate receptor antagonist                                                                           |
| -99.4  | BRD-K43164539 | cholic-acid       | Bile acid                                       | Bile acid                                                                                               |
| -99.44 | BRD-K46068882 | eugenitol         | Bacterial quorum sensing inhibitor              | Bacterial quorum sensing inhibitor, Chromone, Monoamine oxidase inhibitor, Androgen receptor antagonist |
| -99.47 | BRD-K19525698 | ozagrel           | Thromboxane synthase inhibitor                  | Thromboxane synthase inhibitor                                                                          |
| -99.47 | BRD-A44008656 | doxylamine        | Histamine receptor antagonist                   | Histamine receptor antagonist                                                                           |
| -99.47 | BRD-K48692744 | NU-1025           | PARP inhibitor                                  | PARP inhibitor, DNA dependent protein kinase inhibitor                                                  |
| -99.58 | BRD-K64785675 | TG100-115         | -666                                            | -666                                                                                                    |
| -99.58 | BRD-K01192156 | tyrphostin-AG-112 | Protein tyrosine kinase inhibitor               | Protein tyrosine kinase inhibitor                                                                       |
| -99.58 | BRD-K60770992 | pergolide         | Dopamine receptor agonist                       | Dopamine receptor agonist                                                                               |

|        |               |                                      |                                         |                                                              |
|--------|---------------|--------------------------------------|-----------------------------------------|--------------------------------------------------------------|
| -99.58 | BRD-A31800922 | procyclidine                         | Acetylcholine receptor antagonist       | Acetylcholine receptor antagonist                            |
| -99.58 | BRD-K05673000 | dicloxacillin                        | Bacterial cell wall synthesis inhibitor | Bacterial cell wall synthesis inhibitor                      |
| -99.58 | BRD-K76205745 | losartan                             | Angiotensin receptor antagonist         | Angiotensin receptor antagonist                              |
| -99.61 | BRD-A74500471 | ethambutol                           | Bacterial cell wall synthesis inhibitor | Bacterial cell wall synthesis inhibitor                      |
| -99.61 | BRD-K03670461 | tyrphostin-AG-82                     | EGFR inhibitor                          | EGFR inhibitor                                               |
| -99.61 | BRD-K05395900 | nicotine                             | Acetylcholine receptor agonist          | Acetylcholine receptor agonist                               |
| -99.64 | BRD-K14643723 | 4-(2-Amino-ethyl)-benzenesulfonamide | carbonic anhydrase inhibitor            | carbonic anhydrase inhibitor                                 |
| -99.65 | BRD-K17349619 | HLI-373                              | MDM inhibitor                           | MDM inhibitor                                                |
| -99.65 | BRD-A34255068 | rolipram                             | Phosphodiesterase inhibitor             | Phosphodiesterase inhibitor, Interleukin receptor antagonist |
| -99.67 | BRD-A22143024 | estropipate                          | Estrogen receptor agonist               | Estrogen receptor agonist                                    |
| -99.68 | BRD-K33483813 | actarit                              | Interleukin receptor agonist            | Interleukin receptor agonist                                 |
| -99.68 | BRD-K08273968 | griseofulvin                         | Tubulin inhibitor                       | Tubulin inhibitor                                            |
| -99.72 | BRD-K91696562 | orantinib                            | FGFR inhibitor                          | FGFR inhibitor, VEGFR inhibitor, PDGFR receptor inhibitor    |
| -99.72 | BRD-K57926513 | tyrphostin-AG-1295                   | PDGFR receptor inhibitor                | PDGFR receptor inhibitor                                     |
| -99.72 | BRD-A06390036 | hydroquinidine                       | Antiarrhythmic                          | Antiarrhythmic                                               |
| -99.72 | BRD-A48809242 | IB-MECA                              | Adenosine receptor agonist              | Adenosine receptor agonist                                   |
| -99.72 | BRD-A80793822 | pemoline                             | Dopamine receptor agonist               | Dopamine receptor agonist                                    |
| -99.72 | BRD-K98426715 | tubacin                              | HDAC inhibitor                          | HDAC inhibitor                                               |
| -99.72 | BRD-K19416115 | sitagliptin                          | Dipeptidyl peptidase inhibitor          | Dipeptidyl peptidase inhibitor                               |

|        |               |                |                                         |                                         |
|--------|---------------|----------------|-----------------------------------------|-----------------------------------------|
| -99.75 | BRD-K37130656 | rivaroxaban    | Coagulation inhibitor                   | Coagulation inhibitor                   |
| -99.75 | BRD-K08924299 | palonosetron   | Serotonin receptor antagonist           | Serotonin receptor antagonist           |
| -99.75 | BRD-K55703048 | latrepirdine   | Glutamate receptor antagonist           | Glutamate receptor antagonist           |
| -99.75 | BRD-K48923948 | BMS-641988     | Androgen receptor antagonist            | Androgen receptor antagonist            |
| -99.75 | BRD-K54314721 | zolmitriptan   | Serotonin receptor agonist              | Serotonin receptor agonist              |
| -99.75 | BRD-K09859624 | methantheline  | Acetylcholine receptor antagonist       | Acetylcholine receptor antagonist       |
| -99.75 | BRD-A24228527 | ofloxacin      | Bacterial DNA gyrase inhibitor          | Bacterial DNA gyrase inhibitor          |
| -99.79 | BRD-K50720187 | flupirtine     | Glutamate receptor antagonist           | Glutamate receptor antagonist           |
| -99.79 | BRD-K30570479 | VU-0400195-3   | Glutamate receptor modulator            | Glutamate receptor modulator            |
| -99.79 | BRD-A73680854 | PT-630         | Dipeptidyl peptidase inhibitor          | Dipeptidyl peptidase inhibitor          |
| -99.79 | BRD-K93095519 | SJ-172550      | MDM inhibitor                           | MDM inhibitor                           |
| -99.8  | BRD-K97181089 | amiloride      | Sodium channel blocker                  | Sodium channel blocker                  |
| -99.82 | BRD-K32107296 | temozolomide   | DNA alkylating agent                    | DNA alkylating agent                    |
| -99.82 | BRD-A17428743 | BW-723C86      | Serotonin receptor agonist              | Serotonin receptor agonist              |
| -99.86 | BRD-K37720887 | SB-525334      | TGF beta receptor inhibitor             | TGF beta receptor inhibitor             |
| -99.93 | BRD-K01779529 | fluoropyruvate | Pyruvate dehydrogenase kinase inhibitor | Pyruvate dehydrogenase kinase inhibitor |
| -100   | BRD-A09533288 | verapamil      | Calcium channel blocker                 | Calcium channel blocker                 |
| -98.06 | BRD-A01787639 | naftopidil     | Adrenergic receptor antagonist          | Adrenergic receptor antagonist          |
| -98.06 | BRD-K17868609 | BRL-54443      | Serotonin receptor agonist              | Serotonin receptor agonist              |
| -98.17 | BRD-K43764301 | dexketoprofen  | Cyclooxygenase inhibitor                | Cyclooxygenase inhibitor                |

|        |               |               |                                          |                                                                                                                                             |
|--------|---------------|---------------|------------------------------------------|---------------------------------------------------------------------------------------------------------------------------------------------|
| -98.17 | BRD-K08547377 | irinotecan    | Topoisomerase inhibitor                  | Topoisomerase inhibitor                                                                                                                     |
| -98.24 | BRD-K55677650 | CO-101244     | Ionotropic glutamate receptor antagonist | Ionotropic glutamate receptor antagonist                                                                                                    |
| -98.27 | BRD-A48237631 | mitomycin-c   | DNA alkylating agent                     | DNA alkylating agent, DNA inhibitor, DNA synthesis inhibitor                                                                                |
| -98.29 | BRD-A59808129 | guggulsterone | Cholesterol inhibitor                    | Cholesterol inhibitor, Estrogen receptor agonist, FXR antagonist, IKK inhibitor, Pregnane X receptor agonist, Progesterone receptor agonist |
| -98.32 | BRD-K53913732 | SB-408124     | Orexin receptor antagonist               | Orexin receptor antagonist                                                                                                                  |
| -98.41 | BRD-K48722833 | iloperidone   | Dopamine receptor antagonist             | Dopamine receptor antagonist, Serotonin receptor antagonist                                                                                 |
| -98.45 | BRD-K17823458 | danoprevir    | HCV inhibitor                            | HCV inhibitor                                                                                                                               |
| -98.47 | BRD-K60476892 | YC-1          | Guanylyl cyclase activator               | Guanylyl cyclase activator                                                                                                                  |
| -98.56 | BRD-K91623615 | ABT-751       | Tubulin inhibitor                        | Tubulin inhibitor                                                                                                                           |
| -98.63 | BRD-M30523314 | vinorelbine   | Tubulin inhibitor                        | Tubulin inhibitor                                                                                                                           |
| -98.63 | BRD-M07438658 | lapatinib     | EGFR inhibitor                           | EGFR inhibitor, ErbB2 inhibitor                                                                                                             |
| -98.66 | BRD-A75552914 | isoxicam      | Cyclooxygenase inhibitor                 | Cyclooxygenase inhibitor                                                                                                                    |
| -98.73 | BRD-A90515964 | guaifenesin   | Expectorant                              | Expectorant                                                                                                                                 |
| -98.77 | BRD-A65280694 | molindone     | Dopamine receptor antagonist             | Dopamine receptor antagonist                                                                                                                |
| -98.84 | BRD-K52751261 | TAK-715       | p38 MAPK inhibitor                       | p38 MAPK inhibitor                                                                                                                          |
| -98.87 | BRD-K96354014 | nifedipine    | Calcium channel blocker                  | Calcium channel blocker                                                                                                                     |
| -98.89 | BRD-K95655893 | MAZ-51        | VEGFR inhibitor                          | VEGFR inhibitor                                                                                                                             |

|        |               |                          |                                               |                                                   |
|--------|---------------|--------------------------|-----------------------------------------------|---------------------------------------------------|
| -98.91 | BRD-A61858259 | CAY-10415                | Insulin sensitizer                            | Insulin sensitizer                                |
| -98.98 | BRD-K89687904 | PKCbeta-inhibitor        | PKC inhibitor                                 | PKC inhibitor                                     |
| -99    | BRD-K39569857 | avrainvillamide-analog-3 | nucleophosmin inhibitor                       | nucleophosmin inhibitor                           |
| -99    | BRD-K87932577 | CDK1-5-inhibitor         | CDK inhibitor                                 | CDK inhibitor, Glycogen synthase kinase inhibitor |
| -99.01 | BRD-K77625572 | etomoxir                 | Carnitine palmitoyltransferase inhibitor      | Carnitine palmitoyltransferase inhibitor          |
| -99.01 | BRD-K73824630 | skatole                  | Thrombin inhibitor                            | Thrombin inhibitor                                |
| -99.01 | BRD-K99411983 | lumicolchicine           | Colchicine isomer, non-binder of microtubules | Colchicine isomer, non-binder of microtubules     |
| -99.04 | BRD-K62012036 | acitretin                | Retinoid receptor agonist                     | Retinoid receptor agonist                         |
| -99.08 | BRD-K43330982 | JTE-013                  | Lysophospholipid receptor antagonist          | Lysophospholipid receptor antagonist              |
| -99.15 | BRD-K70881766 | solanine                 | Acetylcholinesterase inhibitor                | Acetylcholinesterase inhibitor                    |
| -99.19 | BRD-K84085265 | CG-930                   | JNK inhibitor                                 | JNK inhibitor                                     |
| -99.19 | BRD-K01555864 | dibenzoylmethane         | Antineoplastic                                | Antineoplastic                                    |
| -99.23 | BRD-K11905747 | spectinomycin            | Bacterial 30S ribosomal subunit inhibitor     | Bacterial 30S ribosomal subunit inhibitor         |
| -99.26 | BRD-K89210380 | biotin                   | Vitamin B                                     | Vitamin B                                         |
| -99.33 | BRD-K83837640 | JNJ-26854165             | HDAC inhibitor                                | HDAC inhibitor                                    |
| -99.4  | BRD-A65013509 | oxybutynin               | Acetylcholine receptor antagonist             | Acetylcholine receptor antagonist                 |
| -99.44 | BRD-K37516142 | idebenone                | Calcium channel modulator                     | Calcium channel modulator                         |
| -99.51 | BRD-K54708045 | nTZDpa                   | PPAR receptor agonist                         | PPAR receptor agonist                             |
| -99.51 | BRD-K89348303 | ramipril                 | ACE inhibitor                                 | ACE inhibitor                                     |

|        |               |                     |                                                    |                                                                                                      |
|--------|---------------|---------------------|----------------------------------------------------|------------------------------------------------------------------------------------------------------|
| -99.58 | BRD-K32107296 | temozolomide        | DNA alkylating agent                               | DNA alkylating agent                                                                                 |
| -99.61 | BRD-K59184148 | SB-216763           | Glycogen synthase kinase inhibitor                 | Glycogen synthase kinase inhibitor                                                                   |
| -99.65 | BRD-A80017228 | bendroflumethiazide | Sodium/potassium/chloride transporter inhibitor    | Sodium/potassium/chloride transporter inhibitor                                                      |
| -99.68 | BRD-A77299732 | salubrinal          | Eukaryotic translation initiation factor inhibitor | Eukaryotic translation initiation factor inhibitor                                                   |
| -99.68 | BRD-K93176058 | AC-55649            | Retinoid receptor agonist                          | Retinoid receptor agonist                                                                            |
| -99.74 | BRD-K98521173 | desoxycortone       | Mineralocorticoid receptor agonist                 | Mineralocorticoid receptor agonist                                                                   |
| -99.79 | BRD-M47937986 | cefatrizine         | Bacterial cell wall synthesis inhibitor            | Bacterial cell wall synthesis inhibitor                                                              |
| -99.81 | BRD-K55591206 | epigallocatechin    | Nitric oxide synthase inhibitor                    | Nitric oxide synthase inhibitor,<br>Bacterial DNA gyrase inhibitor                                   |
| -99.82 | BRD-K51941867 | LM-1685             | Cyclooxygenase inhibitor                           | Cyclooxygenase inhibitor                                                                             |
| -99.86 | BRD-K94830329 | ataluren            | CFTR channel agonist                               | CFTR channel agonist, Dystrophin stimulant                                                           |
| -99.87 | BRD-A34255068 | rolipram            | Phosphodiesterase inhibitor                        | Phosphodiesterase inhibitor,<br>Interleukin receptor antagonist                                      |
| -99.89 | BRD-K35128472 | 2-aminopurine       | Serine/threonine kinase inhibitor                  | Serine/threonine kinase inhibitor                                                                    |
| -99.89 | BRD-A67438293 | treprostinil        | Prostacyclin analog                                | Prostacyclin analog                                                                                  |
| -99.89 | BRD-K00317371 | RITA                | MDM inhibitor                                      | MDM inhibitor                                                                                        |
| -99.93 | BRD-A80960055 | celastrol           | Anti-inflammatory                                  | Anti-inflammatory, Antioxidant,<br>NFkB pathway inhibitor, HSP inhibitor,<br>Topoisomerase inhibitor |
